# Supplementary material for: The operational cloud retrieval algorithms from TROPOMI on board Sentinel-5 Precursor
Source: Copernicus journal article supplement (doi:10.5194/amt-2017-128), 2017-05-15
Supplement: Supplementary file [file amt-2017-128-AC2-supplement.pdf]

# Interactive comment on “The operational cloud retrieval algorithms from TROPOMI on board Sentinel-5 Precursor” by Diego G. Loyola et al.

## Reply to Anonymous Referee #1

Referee comments are written in black font.

Author replies are written in red font.

Changes in the revised manuscript are written in blue font.

This paper accomplishes two tasks: first, it provides a scientific update of a cloud retrieval algorithm and, second, it summarizes the suite of cloud products that will be available upon the launch of the Sentinel-5 platform with the TROPOMI payload. As such, the readership can be wide and mainly made of two groups of individuals: experts in the field of cloud remote sensing and users of future TROPOMI data. This not only sets higher-than-usual requirements on the amount and quality of information to be conveyed in such a paper, but also demands a mixture of technical and scientific writing style.

In fact, while many concepts can be understood by the expert, users might not have the expertise and the required knowledge to understand the paper, especially when it goes down to error budgets and physical reasoning that support the conclusions of the presented work. Based on the above reasons, I think that this potentially important paper can be greatly improved with respect to readability and scientific information and publication should be warranted upon major revisions.

### Specific comments

#### Abstract

The sentence provided on the higher accuracy of cloud properties derived from the NIR as compared to the TIR is indeed correct, but it is misleading for the reader, because she/he can think that a NIR-TIR comparison is one of the topic of the paper, which is not. So, this statement suits best as part of the introduction or the outlook, but not in the abstract, where, in my opinion, only an objective summary of the main matter of the paper should be given. As an interesting topic on its own (the NIR-TIR comparison), I flag to the authors that within Cloud\_cci (Stengel et al., 2017), TIR retrievals from (A)ATSR are compared with retrievals derived from a combination of TIR and the NIR oxygen A-band channels by MERIS (Fig. 8, p. 21, third panel from above, CTP [hpa]). As outcome, one can appreciate that the addition of the oxygen A-band from MERIS corrects for photon penetration depth issues of the TIR channels and the found average bias amounts to approx 60 hpa, which translates to approx 0.8 km. Consistently, one recent study (Lelli et al. 2016) compared cloud properties derived from the oxygen A-band with the TIR-derived cloud heights of AATSR. It can be seen that TIR cloud retrievals are indeed placed lower (as the ROCINN\_CRB) than the ones derived from the NIR with a scattering cloud layer model, as the ROCINN\_CAL, by an average amount, again, in range 0.6 - 1.0 km. Once the accuracy of ROCINN\_CAL and ROCINN\_CRB will be assessed, it becomes reasonable to state that the oxygen A-band delivers more accurate cloud heights than the ones from TIR channels (albeit uncorrected).

The authors agree with the referee suggestion.

The sentence “Use of the oxygen A-band...” will be moved from the Abstract to the Introduction. The suggested references will be incorporated accordingly.

#### Section 1, Introduction, p 2, l 8-12

Keeping in mind, as research outlook, the impact that a change of the used cloud model in cloud retrieval algorithms can have on the accuracy of retrieved trace gas columns, I appreciate a more detailed presentation of past work (facts and figures) in the field. In fact, the sentence “These

studies have shown that cloud fraction...” is too general knowledge and does not properly convey the importance of the issue to be tackled.

It could be also somehow inaccurate, because when looking at du Piesanie et al (2013), the authors assessed the accuracy of SCIAMACHY water vapor columns as function of changing cloud fraction, optical thickness and cloud top height. They found that, using a scattering cloud model and the OCRA cloud fraction (making their results even more appropriate for this paper), CTH is the most critical parameter for water vapor, while cloud fraction and optical thickness are somewhat less relevant. So, please, expand this paragraph, briefly reporting past results about trace gas accuracy and information on the cloud model assumption that has been respectively used to derive them (wherever available and appropriate).

The authors agree with including previous studies carried out in the field.

See also the reply to the first general comment of referee #2.

This part will be enhanced with more literature and with past results including the suggested reference.

Introduction, p2, l13

Is the spatial resolution the same for all TROPOMI bands? If not, please, report the correct information and briefly discuss how different footprint sizes can influence a joint exploitation (e.g., UV-Vis-NIR and SWIR).

The spatial resolution is not the same for all bands. Band 1 (UV) has  $28 \times 7 \text{ km}^2$  at nadir, bands 2-6 (UV, UVIS, NIR) have  $3.5 \times 7 \text{ km}^2$  at nadir and bands 7-8 (SWIR) have  $7 \times 7 \text{ km}^2$  at nadir.

In the revised manuscript, the spatial resolution will be given for each band and it will be emphasized that these footprints are specified for close-nadir viewing.

Introduction, p2, l17

Overpass time of the mentioned sensors? This is important for the extension of the data record, as different sensing times will record different atmospheres.

The authors agree that this is valuable information. The LST overpass times of the mentioned sensors are: GOME: 10:30 (D), SCIAMACHY: 10:00 (D), OMI: 13:30 (A), GOME-2A: 9:30 (D), GOME-2B: 8:45 (D), TROPOMI: 13:30 (A). Here, D and A denote Descending or Ascending, respectively.

This information will be included in the revised manuscript.

Section 2, p3, l5

What is OCRA CF needed for as “baseline input”?

The term “baseline” may be confusing.

The term “baseline” will be removed in the revised manuscript to read: “...from OCRA as an input.”

p3, l10

It is said the the ROCINN\_CAL is here presented for the first time. Then one might wonder where was the ROCINN\_CRB model presented? Please, provide reference.

The latest versions of both ROCINN\_CAL and ROCINN\_CRB are presented in this manuscript.

The sentence will be re-phrased to: “...for the first time the latest developments of the ROCINN algorithm (incorporating both CAL and CRB models).”

p3, l10-17

This paragraph needs additional details on the errors as function of CRB/CAL, on the same line of thoughts of the impact of the cloud model on the accuracy of trace gases.

The authors agree.

This information will be included. Refer to the author response to the referee comment “Section 1, Introduction, p 2, l 8-12”

Section 2.1, p3, l24

References for ROCINN algorithm?

The authors agree.

References will be added in the revised manuscript.

p3, l27-28

Two aspects are not clear here. (1) why the IPA allows 1-D plane parallel RT of cloud-contaminated scenes and (2) whether the previous statement also holds for future TROPOMI measurements due to 3-D effects. Please, discuss this aspect.

This topic is already covered in Section 5, p11, l22-33.

A reference to Section 5 will be made in the revised manuscript.

p4, l6

PMD-derived cloud fraction benefits not only of the spectral coverage but also of a spatial resolution finer than the science channels. So, please, mention this.

The authors agree that this is valuable information.

The spatial resolution of the PMD footprints will be added in the revised manuscript.

p4, l10

The heritage OMI cloud fraction algorithms need a bit more details to make the reader understand how the cloud detection works. I might understand it, but it is not something all readers can follow.

The authors believe that an in-depth description of all further OMI cloud fraction algorithms is out of the scope of this manuscript. Several references are specified to guide the interested reader.

No change in the manuscript.

Section 3, p4, l22

Figure 1 contains a block which is not properly described in none of the following subsections, the “internal store”. The authors need to address (and amend the manuscript where appropriate) the following questions:

(1) Why the need of a-priori selection if the brightness criterion should already deliver a minimum reflectance?

A-priori, because the cloud-free reflectance background needs to be known beforehand, usually based on a heritage instrument and then successively replaced by the target instrument as the mission goes on. Furthermore, the brightness criterion does not necessarily deliver a minimum reflectance. See also the reply to the comment for Section 3.3, p5, l26.

A short clarification will be added in the revised manuscript.

(2) What is the climatology used for?

The “climatology” are the cloud-free reflectance maps which give the rho\_CF values in equation 3. Examples for these maps are given in Fig. 2.

A short clarification will be added in the revised manuscript.

(3) What climatology? Source, time-space aggregation? Quality of the values? Is a climatology appropriate and does it have shortcomings for the task?

The cloud-free reflectance background maps are based on OMI data from January 2005 to July 2008. They are generated separately for each color B and G. The temporal resolution is one month, i.e. for a given grid cell, all measurements from a given month are aggregated in order to reflect and cover seasonal surface variations. Finally, all data from January 2005, 2006, 2007 and 2008 are considered for the final map for January, etc. The spatial grid resolution is 0.2 degrees in latitude and 0.4 degrees in longitude. The cloud-free reflectance value for a given measurement is found via linear interpolation between the two adjacent monthly cloud-free maps. This approach of a linear interpolation between monthly maps was found to be the best tradeoff between the necessity to have

as many measurements as possible per grid cell in order to ensure a cloud-free situation among these (i.e. a long timescale is desired) and the necessity to be sensitive to rapid changes in the surface conditions like e.g. snowfall or melting (i.e. a short timescale is desired).

A short clarification will be added in the revised manuscript.

Section 3.1, p4, l28

It's the first time I read the terminology "ground-cover projection". What is this?

The authors agree that this is a confusing term.

The sentence will be changed to "...for the footprint of the measurement as:"

Section 3.2, p5, l8

It is said that reflectances are independent of atmosphere and line-of-sight. What do aerosol, Rayleigh and the surface do? Especially for the latter, does surface reflectivity change over the time needed to build the composite? This is crucial, especially when thinking at a small footprint. Please, add information on the impact of these three components on the determination of cloud fraction and the construction of the composite.

OCRA does not separate aerosols and clouds. The surface reflectivity change over the time is covered by the generation of monthly cloud-free reflectance maps with a linear interpolation between the two adjacent monthly cloud-free maps.

A short clarification will be added in the revised manuscript.

Equation 2

Is the comma correct here?

No it is not.

The second comma will be changed to a full stop.

p5, l14

It is difficult to understand the correct domain of the gb-chromaticity diagram. What is exactly the (1/2, 1/2) point referring to?

This point refers to a situation where B and G are equal, i.e. there is no wavelength dependence in the UV/VIS region which is interpreted as a scene fully covered by clouds. The OCRA assumption for a cloud is that the brightness is higher than the underlying surface (caution for snow/ice) and that the cloud spectrum is wavelength independent in the UV/VIS (i.e. B=G).

A short clarification will be added in the revised manuscript.

Section 3.3, p5, l26

I don't understand why the functions max and min must ensure that cloud fraction is confined in the interval [0,1]. Aren't already the cloud free reflectances  $\rho_{cf}$  the minimum available for the scene and aren't the  $\beta$  already compensating for radiative affects? What are the physical units of the coefficients  $\alpha$  and  $\beta$ ? Are they unit-less?

The cloud free reflectances  $\rho_{cf}$  do not necessarily represent the minimum available for the scene. In the normalized gb-chromaticity diagram the situation furthest away from (1/2, 1/2) is searched and the corresponding B and G values of that individual measurement are written into the cloud free background map (i.e. the B and G values of the same grid cell belong to *one* individual measurement). Taking the absolute minimum B and G available would only work if B and G were treated independently. This is not done within OCRA.

The betas compensate for extremely "dark" scenes e.g. mountain shadows, solar eclipse tracks or partially for absorbing aerosols. The coefficients are only based on reflectance *differences* and hence unitless.

A short clarification will be added in the revised manuscript.

Section 3.3.1

Recalling that specular reflection occurs when the viewing zenith angle equals the angle of illumination, given zero azimuth, could the authors briefly add an explanation of the need of a reflectance ratio criterium, instead of only geometrical consideration?

The authors agree that this is a confusing paragraph.

The part with the reflectance ratios will be removed since it is irrelevant for the determination of the purely geometrical determination of the sunglint flag. On page 6, line 5, the sentence will be re-phrased to "..., a simplified sun-glint *flagging* will be used."

Section 4, p6, l19-20

It is said that the limitations of the CRB model are already noticeable with GOME-2. Where to find information on this? What limitations? Please, explain.

The authors agree that the text should be expanded here.

Specific information on the limitations (i.e. overestimation of the ozone ghost column) and relevant references will be included in the revised manuscript.

p6, l22

When the authors write that the layers are optically uniform, what properties are they addressing? LWP, droplet phase function, number concentration or? Please, add information on what optical properties are kept uniform.

The cloud microphysical properties are not included in the current manuscript and the authors agree that this information needs to be specified. The authors consider only liquid water clouds (i.e. Cu, St, Sc) with a certain size distribution and a single phase scattering function in the parameterization. Revised manuscript will be updated including this information.

Section 4

While the technique of wavelength recalibration is often omitted in modern papers about cloud remote sensing, it is relevant on its own. The authors might want to provide here more technical information so that the reader can independently implement it. Among the details to be provided, the following turn out to be useful: spectral sampling of the reference solar irradiance and source; fitting procedure, description of polynomials used in the spectral bins to find the optimal grid and iterations; value of calibration accuracy that can be achieved; references to past literature and technical documents, whenever appropriate (e.g., van Geffen and van Oss, 2003).

Since this is not a technical paper, the authors propose to give only a high-level description of the recalibration procedure.

The following information will be added to the revised manuscript: source and sampling of solar reference, fitting procedure, description of polynomials. As Solar reference we use Chance and Kurucz, (2010).

Section 4.2, p7, l11

How many scattering layers are clouds made of? Please, provide this information

The authors consider only one scattering cloud layer.

The sentence will be re-phrased to "... cloud treated as a single scattering layer."

Section 4.4, p8, l12

I am puzzled by the statement that the "desired total intensity I will incorporate the effects of polarization". Since we are placed in the NIR region and that the authors state that the thermodynamic phase of water is not relevant for the task under consideration (implying that the retrieval algorithm will not discriminate between water and ice, the latter best seen looking at Stokes Q), I do not see the strict need to simulate all components of the Stokes vector. Could you please clarify in the text how and why you do run VLIDORT? If you have pre-calculated all Stokes components, but you interpolate to find the match between measurement and forward intensity only for Stokes I? Is this a requirement for future applications at trace gas retrieval?

The reason of using the VLIDORT implementation including polarization instead of LIDORT is because a vector RTM is necessary for processing GOME, SCIAMACHY and GOME-2 data, which provide polarization information.

A short clarification will be added in the revised manuscript.

p8, 115

Please, provide the spectral resolution in nm instead of wavenumbers.

The authors agree.

The revised manuscript will be added accordingly.

p8, 121-22

Please, state here whether your algorithm will be sensitive to the ice phase.

The authors clarify that ROCINN is not sensitive to ice-phase clouds.

This part will be re-phrased in the revised manuscript.

p9, 19-13

As far as I know, the accuracy of a neural network (NN) approach depends on the training set. Do I correctly understand that here the training set is purely synthetic and is made of NIR radiances, without external real datasets as, for instance, from measurements in the thermal infrared?

The authors confirm that the training set is purely synthetic (VLIDORT simulations).

Moreover, I find confusing the role of the NN within the ROCINN framework for TROPOMI. In an earlier version of the ROCINN algorithm (Loyola et al., 2007), as applied to GOME measurements, the NN was used to solve the inverse problem, whereas the NN of this TROPOMI-ROCINN version solves the forward problem and the inversion is left to Tikhonov-Phillips. If this is true, this information should be clearly stated in the paper to avoid confusion and justified from the perspective of the training sets. So, please, help the reader fully understand what development has been undertaken from the old ROCINN to this new version.

The authors agree that a clarification needs to be added.

The information on the different usage of NNs in the previous and current algorithm versions will be included in the revised manuscript at the end of Section 4.

Section 4.7

This section has several shortcomings and seems to be written in haste. Basically, explanation of the results presented in all three figures and geophysical settings of this exercise are missing. I list my remarks in the following bullets.

1. The space of sampled geometries and cloud properties is not given. Thus, the reader does not know if the biases of the CRB retrieval (Figure 5) are coming from low-, mid- or high-level clouds.

The whole geometry space (only for VZA the range is from 0 to 75 degrees and not up to 90) is covered using the smart sampling technique. The CTH range was 2-15 km and the respective COT 2-50.

This information will be included in the revised manuscript

2. Figure 4 is clearly not informative. Not only are the curves not color-coded, but one cannot understand what spectra are overlapping and why. I suggest to remove it, also because the shape of the oxygen A-band as function of changes of the main atmospheric properties under consideration is already well-known.

The authors agree with the comment.

Figure 4 will be removed from the manuscript.

3. It is well-known that COT accuracy is strongly dependent on the viewing geometry. So, Figure 6 (left) should also address this information and provide the reader with more confidence that

deviations from the 0-bias median are due to viewing-geometries (or are there other reasons?). Either increase the size bin of the x-axis, or color-code as function of VZA/SZA.

The size bin of the x-axis can be increased.

Figure will be updated.

4. As long as the range of retrieved COT is not given, recalling that COT spans three orders of magnitude and that COT errors are usually non linear, the left plot of Figure 6 is little informative. So, please, provide more explanation on this aspect.

The retrieved COT varies from 2 to 50.

Information will be added to the figure.

5. Figure 6 is not consistent, because COT bias is juxtaposed for one model (CAL) with the cloud albedo (CA) bias for the other model (CRB). And because no information is given on the correspondence between COT and CA, one cannot judge the performance of the two models within this task. So, either add also a CA bias plot for the CAL model and a COT bias plot for the CRB model or provide a clear description on why the two plots can be regarded as the manifestation of the same process/effect.

It is not possible to retrieve CA from the CAL model or COT from the CRB model.

Information on the CA and COT relation will be added in the paper.

6. Please, define in text (and in the figures/captions) how are differences calculated. Are these relative or absolute errors?

These are absolute differences (a-b), and not relative differences.

This information will be mentioned in the caption and in the text.

7. Please, provide in the text a physical explanation why the cloud albedo difference is not symmetric about the 0-bias line, while the COT bias is, and why should CA be likely underestimated with the CRB model, as the red PDF is slightly skewed into the negative domain.

The CA difference is only slightly negative.

Explanation will be added in the text.

Section 4.5, p10, l3

What are the other options the inverse framework allows? If the narrative of the paper requires this information, then provide it. Otherwise the sentence sounds odd and disconnected from the general flow.

The authors agree that this formulation may cause confusion.

The text in the revised manuscript starting with “, but the inverse framework...” will be removed.

Section 5, p11, l20-21

Could you provide exact figures on the error in COT due to uncertainties in surface albedo and size distribution parameters, in the same fashion you do for the influence of cloud geometrical fraction? The sentence is too general.

The requested figures and information have been published in Schuessler et al., (2014).

The uncertainties in COT and the corresponding reference will be added to the revised manuscript.

p12, l 1-4

Do you have a reference for the TROPOMI calibration exercise?

The reference is the “NIR out-of-spectral band straylight analysis report” (S5P-KNMI-OCAL-0152-RP, issue 0.1, 2017-05-11, in review).

The above reference will be added to the manuscript.

Section 5.1, p12, l 9



Where can the TROPOMI mapping tables be found? Are they publicly available? If yes, why not mention the source?

The reference to the documentation of the mapping tables is “Sentinel 5 precursor interband coregistration mapping tables” (S5P-KNMI-L2-0129-TN, issue 4.0.0, 2015-11-23, released).

The reference to the documentation will be added to the revised manuscript.

## Section 6

It is clearly a matter of style, so, as suggestion, I would opt for compactness and avoid undue subsectioning, so that the flow of the paper isn't broken too much. I think it would suffice to rename the title of Section 6 and regroup the comparisons as follows

Section 6 “Application to OMI and GOME-2 and comparison with independent retrievals”

Section 6.1 “Comparison of OCRA with OMI and MODIS cloud fraction”

Section 6.2 “Comparison of ROCINN with GOME-2 cloud top height and thickness”

The authors agree with the suggestion, the sub-subsections will be removed.

Section 6 will be re-structured according to the suggestions from the referee.

Section 6.1, p13, l8: Here is a typo in the manuscript. It must say from January 2005 to June 2008.

## Section 6.1, p13 l9

I think the authors should check the sequence of figures, because the OCRA cloud-free background has numbering 2, while belonging to a later section.

The authors agree.

On page 5, line 18, the part “(see Figure 2 for example)” will be removed. Figure 2 will become Figure 7 and be introduced in Section 6.1.

## Section 6.1.1, p13, l23

What kind of MODIS platform and product is? No reference is given here and the naming OMMYDCLD suggest that the authors use Aqua and not Terra. With this respect, the different radiometric performance between Aqua and Terra could also impact the zonal comparison of Figure 8. But in absence of a clear reference, no judgment can be given.

The used OMMYDCLD product provides the OMI/Aura and MODIS/Aqua merged cloud product. The proper reference is given in section 6.1.1 (third bullet point). No MODIS/Terra data are used.

It will be clarified in the manuscript that only Aqua, but no Terra data are used.

## p13, l26-27

Are the overpass times of OMI and MODIS comparable? Could you please add this information, if relevant for the differences found in the zonal plot?

Since both Aura and Aqua are part of the A-train, the overpass times are comparable. The nominal separation between Aura and Aqua of 15 minutes was reduced to 8 minutes. The 8 minutes difference may become significant when comparing a single pixel during strong wind speeds, however for the averaging done for the zonal mean plots, the slightly different overpass times of OMI/Aura and MODIS/Aqua are not relevant and cannot be accounted for the shown differences.

It will be added to the revised manuscript that the overpass times of OMI and MODIS are comparable. The differences found in the zonal plot cannot be related to differences in overpass times.

## p13, l27

Can the author substantiate with references or with a physical reasoning the statement “The UV sensors are not sensitive to optically thick clouds”?

This is a typo. It should say “thin” instead of “thick”.

This will be corrected in the revised manuscript.



p14, l1-3

While it is clear that fixing the albedo of a cloud at 0.8 (a too large value and to substantiate this statement you can cite Lelli et al, AMT 2012 - and report the mean global cloud albedo value of 0.63 and 0.55 from ROCINN) leads to a lower cloud fraction because the radiative balance within a pixel must be conserved (even if, strictly speaking, this general statement should be first checked against the RT assumptions of the respective cloud fraction algorithms), it is not clear why OMI-derived cloud fractions are still different from MODIS, even without assuming a fixed cloud albedo. In absence of a quantitative and third cloud fraction source, it is not sound to say that OCRA and OMAERUV are underestimating (MODIS could overestimate as well), but still a physical explanation for this discrepancy should be given. Is this a geometrical, radiative or sampling effect?

The authors agree to add the information on mean global cloud albedo and to add the suggested reference. The authors emphasize that a direct comparison between the MODIS geometric cloud fraction and the OMI derived radiometric or effective cloud fractions should be treated with caution.

For the latter, I mention that if the L2 collocation procedure is avoided and the authors deploy a resampling of downstream daily gridded L3 to match OMI spatial resolution, then biases can occur. One should consider the number of available measurements with respect to the gradient of the cloud property within the spatial box to be gridded (cfr. Levy et al. 2009).

The authors clarify that OMMYDCLD product contains a MODIS cloud fraction already sampled to the OMI footprints.

Figure 8 would be more informative if the zonal plots would be split for values above land and water masses.

The authors agree to provide two separate figures (only land and only ocean) as suggested.

The manuscript will be updated with the points specified above.

## References

Lelli L, Weber M and Burrows JP (2016) Evaluation of SCIAMACHY ESA/DLR Cloud Parameters Version 5.02 by Comparisons to Ground-Based and Other Satellite Data.

Front. Environ. Sci. 4:43. doi: 10.3389/fenvs.2016.00043

Stengel, M., Stapelberg, S., Sus, O., Schlundt, C., Poulsen, C., Thomas, G., Christensen, M., Carbajal Henken, C., Preusker, R., Fischer, J., Devasthale, A., Willén, U., Karlsson, K.-G., McGarragh, G. R., Proud, S., Povey, A. C., Grainger, D. G., Meirink, J. F., Feofilov, A., Bennartz, R., Bojanowski, J., and Hollmann, R.: Cloud property datasets retrieved from AVHRR, MODIS, AATSR and MERIS in the framework of the Cloud\_cci project, Earth Syst. Sci. Data Discuss., <https://doi.org/10.5194/essd-2017-48>, in review, 2017.

du Piesanie, A., Piters, A. J. M., Aben, I., Schrijver, H., Wang, P., and Noël, S.: Validation of two independent retrievals of SCIAMACHY water vapour columns using radiosonde data, Atmos. Meas. Tech., 6, 2925-2940, doi:10.5194/amt-6-2925-2013, 2013.

J. van Geffen and R. van Oss, Wavelength calibration of spectra measured by the Global Ozone Monitoring Experiment by use of a high-resolution reference spectrum, Appl. Opt. 42, 2739-2753 (2003).

Lelli, L., Kokhanovsky, A. A., Rozanov, V. V., Vountas, M., Sayer, A. M., and Burrows, J. P.: Seven years of global retrieval of cloud properties using space-borne data of GOME, Atmos. Meas. Tech., 5, 1551-1570, doi:10.5194/amt-5-1551-2012, 2012.

R. C. Levy, G. G. Leptoukh, R. Kahn, V. Zubko, A. Gopalan and L. A. Remer, A Critical Look at Deriving Monthly Aerosol Optical Depth From Satellite Data, in IEEE Transactions on Geoscience and Remote Sensing, vol. 47, no. 8, pp. 2942-2956, Aug. 2009. doi: 10.1109/TGRS.2009.2013842

---

Interactive comment on Atmos. Meas. Tech. Discuss., doi:10.5194/amt-2017-128, 2017.
